# Supplementary material for: PTIP associates with Artemis to dictate DNA repair pathway choice
Source: PubMed Central journal article supplement — Genes Dev. 2014 Dec 15;28(24):2693–8. doi: 10.1101/gad.252478.114 (PMC4265673; doi:10.1101/gad.252478.114), 2014-12-15
Supplement: supp_28.24.2693_Supplemental_Figure_3.pdf [file supp_28.24.2693_Supplemental_Figure_3.pdf]

| -IR |                             | +IR |                               |
|-----|-----------------------------|-----|-------------------------------|
| 518 | ESLENFPSSTVAGGSQSPK         | 518 | ESLENFPSSTVAGGSQSPK           |
| 516 | ESLENFPSSTVAGGSQSPK         | 516 | ESLENFPSSTVAGGSQSPK           |
| 385 | DSEEEEDDYLFDDPLPIPLR        | 385 | DSEEEEDDYLFDDPLPIPLR          |
| 380 | ARTVHRDS#EEEDDYLFDDPLPIPLR  | 380 | ARTVHRDSEEEEDDYLFDDPLPIPLR    |
| 567 | NSGDITSLDK                  | 567 | NSGDITSLDK                    |
| 688 | KCSLLDT                     | 688 | KCSLLDT                       |
| 503 | RNDEITDESELENFPSSTVAGGSQSPK | 503 | RNDEITDESELENFPSSTVAGGSQSPK   |
|     |                             | 645 | SLLNLSTNADSQSSDFEVPSTPEAELPKR |
|     |                             | 647 | SLLNLSTNADSQSSDFEVPSTPEAELPKR |
|     |                             | 648 | SLLNLSTNADSQSSDFEVPSTPEAELPKR |
|     |                             | 649 | SLLNLSTNADSQSSDFEVPSTPEAELPKR |
|     |                             | 655 | SLLNLSTNADSQSSDFEVPSTPEAELPKR |
|     |                             | 656 | SLLNLSTNADSQSSDFEVPSTPEAELPKR |
