# Supplementary figures and images for: PTIP associates with Artemis to dictate DNA repair pathway choice
Source: PubMed Central journal article supplement — Genes Dev. 2014 Dec 15;28(24):2693–8. doi: 10.1101/gad.252478.114 (PMC4265673; doi:10.1101/gad.252478.114), 2014-12-15

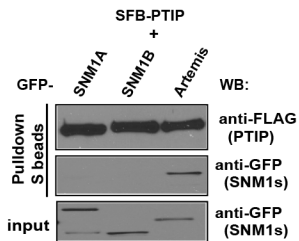

Supplement: supp_28.24.2693_Supplemental_Figure_1.pdf [file supp_28.24.2693_Supplemental_Figure_1.pdf]

A

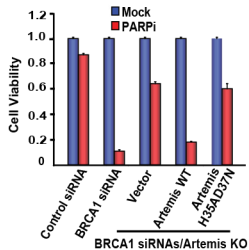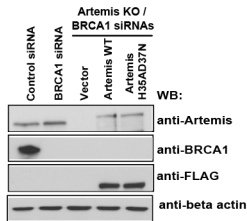

B

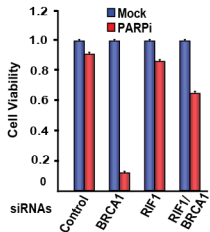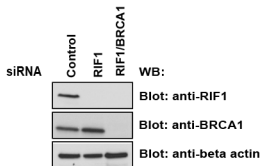

Supplement: supp_28.24.2693_Supplemental_Figure_2.pdf [file supp_28.24.2693_Supplemental_Figure_2.pdf]
